# Supplementary material for: How Do Fresh Live Broadcast Impact Consumers’ Purchase Intention? Based on the SOR Theory
Source: MDPI journal article supplement (doi:10.3390/su142114382), 2022-11-03
Supplement: s1 [file s1]

## Supplementary Materials

**Table S1.** Questionnaire item.

| Latent Variable<br>Name            | Code | Item                                                                                                      |
|------------------------------------|------|-----------------------------------------------------------------------------------------------------------|
| Visibility(V)                      | V1   | In the live broadcast room, I can see the appearance characteristics of fresh products                    |
|                                    | V2   | In the live broadcast room, I can learn about fresh products                                              |
|                                    | V3   | The live room provided visual scenes to help me understand the details of the product                     |
| Interactivity(I)                   | I1   | I think the streamer can actively respond to the viewers' questions during the live broadcast             |
|                                    | I2   | During the live broadcast, I can communicate product-related questions with the streamer or other viewers |
|                                    | I3   | I think the live broadcast room provides a good communication platform between consumers and sellers      |
| Authenticity(A<br>)                | A1   | During the live broadcast, the anchor will display the fresh products from multiple angles                |
|                                    | A2   | The anchor's detailed introduction to fresh products made me feel real                                    |
|                                    | A3   | The anchor's tasting experience of the product made me feel real                                          |
| Perceived<br>Utility<br>value(PUV) | PUV1 | Watching live streams of fresh produce was helpful for me                                                 |
|                                    | PUV2 | Watching live streams of fresh produce is practical for me                                                |
|                                    | PUV3 | Shopping on the live streaming platform made me feel convenient                                           |
| Perceived<br>Hedonic<br>value(PHV) | PHV1 | Watching live streams of fresh produce is fun                                                             |
|                                    | PHV2 | Watching the live stream of fresh products makes me feel good                                             |
|                                    | PHV3 | Watching the live stream of fresh products made me feel relaxed                                           |
| Perceived<br>Trust(PT)             | PT1  | I believe that the anchor will try to solve my problems during the live broadcast                         |
|                                    | PT2  | I believe anchors and other consumers are genuine when they interact with me                              |
|                                    | PT3  | I believe that the anchor provides information about the product                                          |
| Purchase<br>Intention(PI)          | PI1  | Live streaming is a big help to my buying behavior                                                        |
|                                    | PI2  | I am willing to look for my favorite fresh products in the live broadcast room                            |

PI3 I would like to buy fresh products in the live room

---
